# Supplementary material for: The Current Concept of Paternal Bonding: A Systematic Scoping Review
Source: MDPI journal article supplement (doi:10.3390/healthcare10112265), 2022-11-11
Supplement: s1 [file s1]

## Supplementary: Search strategies

### */ PubMed*

("paternal bonding"[tw] OR "paternal bond"[tw] OR "paternal bonds"[tw] OR "paternal bond\*"[tw] OR "father bond\*"[tw] OR "father infant bond\*"[tw] OR "father daughter bond\*"[tw] OR "father son bond\*"[tw] OR "father to infant bond\*"[tw] OR "father to daughter bond\*"[tw] OR "father to son bond\*"[tw] OR "paternal infant bond\*"[tw] OR "paternal daughter bond\*"[tw] OR "paternal son bond\*"[tw] OR "paternal to infant bond\*"[tw] OR "paternal to daughter bond\*"[tw] OR "paternal to son bond\*"[tw] OR "paternal fetus bond\*"[tw] OR "father fetus bond\*"[tw] OR "paternal foetus bond\*"[tw] OR "father foetus bond\*"[tw] OR "paternal to fetus bond\*"[tw] OR "father to fetus bond\*"[tw] OR "paternal to foetus bond\*"[tw] OR "father to foetus bond\*"[tw] OR "paternal child bond\*"[tw] OR "father child bond\*"[tw] OR "paternal to child bond\*"[tw] OR "father to child bond\*"[tw] OR "paternal attach\*"[tw] OR "father attach\*"[tw] OR "father infant attach\*"[tw] OR "father daughter attach\*"[tw] OR "father son attach\*"[tw] OR "father to infant attach\*"[tw] OR "father to daughter attach\*"[tw] OR "father to son attach\*"[tw] OR "paternal infant attach\*"[tw] OR "paternal daughter attach\*"[tw] OR "paternal son attach\*"[tw] OR "paternal to infant attach\*"[tw] OR "paternal to daughter attach\*"[tw] OR "paternal to son attach\*"[tw] OR "paternal fetus attach\*"[tw] OR "father fetus attach\*"[tw] OR "paternal foetus attach\*"[tw] OR "father foetus attach\*"[tw] OR "paternal to fetus attach\*"[tw] OR "father to fetus attach\*"[tw] OR "paternal to foetus attach\*"[tw] OR "father to foetus attach\*"[tw] OR "paternal child attach\*"[tw] OR "father child attach\*"[tw] OR "paternal to child attach\*"[tw] OR "father to child attach\*"[tw] OR "paternal adolescent bond\*"[tw] OR "father adolescent bond\*"[tw] OR "paternal to adolescent bond\*"[tw] OR

"father to adolescent bond\*[tw] OR "paternal adolescent attach\*[tw] OR "father adolescent attach\*[tw] OR "paternal to adolescent attach\*[tw] OR "father to adolescent attach\*[tw] OR ("Father-Child Relations"[Mesh] AND "Object Attachment"[Mesh]) OR (("bonding"[ti] OR "bond"[ti] OR "bonds"[ti] OR "bonded"[ti] OR bond\*[ti]) AND (father\*[ti] OR paternal\*[ti])) OR (("attachment"[ti] OR "attach\*[ti]) AND (father\*[ti] OR paternal\*[ti])) OR (("bonding"[tw] OR "bond"[tw] OR "bonds"[tw] OR "bonded"[tw] OR bond\*[tw] OR attach\*[tw]) AND ("infant\*[tw] OR "child\*[tw] OR "daughter\*[tw] OR "son"[tw] OR "sons"[tw] OR "fetus\*[tw] OR "foetus\*[tw] OR "adolescent\*[tw]) AND (father\*[ti] OR paternal\*[ti])) OR (("bonding"[ti] OR "bond"[ti] OR "bonds"[ti] OR "bonded"[ti] OR bond\*[ti] OR attach\*[ti]) AND ("infant\*[tw] OR "child\*[tw] OR "daughter\*[tw] OR "son"[tw] OR "sons"[tw] OR "fetus\*[tw] OR "foetus\*[tw] OR "adolescent\*[tw]) AND (father\*[tw] OR paternal\*[tw]))))

// **MEDLINE via OVID**

("paternal bonding".mp OR "paternal bond".mp OR "paternal bonds".mp OR "paternal bond\*".mp OR "father bond\*".mp OR "father infant bond\*".mp OR "father daughter bond\*".mp OR "father son bond\*".mp OR "father to infant bond\*".mp OR "father to daughter bond\*".mp OR "father to son bond\*".mp OR "paternal infant bond\*".mp OR "paternal daughter bond\*".mp OR "paternal son bond\*".mp OR "paternal to infant bond\*".mp OR "paternal to daughter bond\*".mp OR "paternal to son bond\*".mp OR "paternal fetus bond\*".mp OR "father fetus bond\*".mp OR "paternal foetus bond\*".mp OR "father foetus bond\*".mp OR "paternal to fetus bond\*".mp OR "father to fetus bond\*".mp OR "paternal to foetus bond\*".mp OR "father to foetus bond\*".mp OR "paternal child bond\*".mp OR "father child bond\*".mp OR "paternal to child bond\*".mp OR "father to child bond\*".mp OR "paternal attach\*".mp OR "father attach\*".mp OR "father infant attach\*".mp OR "father

daughter attach\*".mp OR "father son attach\*".mp OR "father to infant attach\*".mp OR  
 "father to daughter attach\*".mp OR "father to son attach\*".mp OR "paternal infant  
 attach\*".mp OR "paternal daughter attach\*".mp OR "paternal son attach\*".mp OR "paternal  
 to infant attach\*".mp OR "paternal to daughter attach\*".mp OR "paternal to son attach\*".mp  
 OR "paternal fetus attach\*".mp OR "father fetus attach\*".mp OR "paternal foetus attach\*".mp  
 OR "father foetus attach\*".mp OR "paternal to fetus attach\*".mp OR "father to fetus  
 attach\*".mp OR "paternal to foetus attach\*".mp OR "father to foetus attach\*".mp OR  
 "paternal child attach\*".mp OR "father child attach\*".mp OR "paternal to child attach\*".mp  
 OR "father to child attach\*".mp OR "paternal adolescent bond\*".mp OR "father adolescent  
 bond\*".mp OR "paternal to adolescent bond\*".mp OR "father to adolescent bond\*".mp OR  
 "paternal adolescent attach\*".mp OR "father adolescent attach\*".mp OR "paternal to  
 adolescent attach\*".mp OR "father to adolescent attach\*".mp OR ("Father-Child Relations"/  
 AND "Object Attachment"/) OR (("bonding".ti OR "bond".ti OR "bonds".ti OR "bonded".ti  
 OR bond\*.ti) AND (father\*.ti OR paternal\*.ti)) OR (("attachment".ti OR "attach\*".ti) AND  
 (father\*.ti OR paternal\*.ti)) OR (("bonding".mp OR "bond".mp OR "bonds".mp OR  
 "bonded".mp OR bond\*.mp OR attach\*.mp) AND ("infant\*".mp OR "child\*".mp OR  
 "daughter\*".mp OR "son".mp OR "sons".mp OR "fetus\*".mp OR "foetus\*".mp OR  
 "adolescent\*".mp) AND (father\*.ti OR paternal\*.ti)) OR (("bonding".ti OR "bond".ti OR  
 "bonds".ti OR "bonded".ti OR bond\*.ti OR attach\*.ti) AND ("infant\*".mp OR "child\*".mp  
 OR "daughter\*".mp OR "son".mp OR "sons".mp OR "fetus\*".mp OR "foetus\*".mp OR  
 "adolescent\*".mp) AND (father\*.mp OR paternal\*.mp)) OR (("bonding".mp OR "bond".mp  
 OR "bonds".mp OR "bonded".mp OR bond\*.mp) ADJ5 (father\*.mp OR paternal\*.mp)))

///. *Embase*

("paternal bonding".mp OR "paternal bond".mp OR "paternal bonds".mp OR "paternal  
 bond\*".mp OR "father bond\*".mp OR "father infant bond\*".mp OR "father daughter  
 bond\*".mp OR "father son bond\*".mp OR "father to infant bond\*".mp OR "father to daughter  
 bond\*".mp OR "father to son bond\*".mp OR "paternal infant bond\*".mp OR "paternal  
 daughter bond\*".mp OR "paternal son bond\*".mp OR "paternal to infant bond\*".mp OR  
 "paternal to daughter bond\*".mp OR "paternal to son bond\*".mp OR "paternal fetus  
 bond\*".mp OR "father fetus bond\*".mp OR "paternal foetus bond\*".mp OR "father foetus  
 bond\*".mp OR "paternal to fetus bond\*".mp OR "father to fetus bond\*".mp OR "paternal to  
 foetus bond\*".mp OR "father to foetus bond\*".mp OR "paternal child bond\*".mp OR "father  
 child bond\*".mp OR "paternal to child bond\*".mp OR "father to child bond\*".mp OR  
 "paternal attach\*".mp OR "father attach\*".mp OR "father infant attach\*".mp OR "father  
 daughter attach\*".mp OR "father son attach\*".mp OR "father to infant attach\*".mp OR  
 "father to daughter attach\*".mp OR "father to son attach\*".mp OR "paternal infant  
 attach\*".mp OR "paternal daughter attach\*".mp OR "paternal son attach\*".mp OR "paternal  
 to infant attach\*".mp OR "paternal to daughter attach\*".mp OR "paternal to son attach\*".mp  
 OR "paternal fetus attach\*".mp OR "father fetus attach\*".mp OR "paternal foetus attach\*".mp  
 OR "father foetus attach\*".mp OR "paternal to fetus attach\*".mp OR "father to fetus  
 attach\*".mp OR "paternal to foetus attach\*".mp OR "father to foetus attach\*".mp OR  
 "paternal child attach\*".mp OR "father child attach\*".mp OR "paternal to child attach\*".mp  
 OR "father to child attach\*".mp OR "paternal adolescent bond\*".mp OR "father adolescent  
 bond\*".mp OR "paternal to adolescent bond\*".mp OR "father to adolescent bond\*".mp OR  
 "paternal adolescent attach\*".mp OR "father adolescent attach\*".mp OR "paternal to  
 adolescent attach\*".mp OR "father to adolescent attach\*".mp OR ("father child relation"/  
 AND exp "Social Bonding"/) OR (("bonding".ti OR "bond".ti OR "bonds".ti OR "bonded".ti  
 OR bond\*.ti) AND (father\*.ti OR paternal\*.ti)) OR (("attachment".ti OR "attach\*".ti) AND

(father\*.ti OR paternal\*.ti)) OR (("bonding".mp OR "bond".mp OR "bonds".mp OR "bonded".mp OR bond\*.mp OR attach\*.mp) AND ("infant\*".mp OR "child\*".mp OR "daughter\*".mp OR "son".mp OR "sons".mp OR "fetus\*".mp OR "foetus\*".mp OR "adolescent\*".mp) AND (father\*.ti OR paternal\*.ti)) OR (("bonding".ti OR "bond".ti OR "bonds".ti OR "bonded".ti OR bond\*.ti OR attach\*.ti) AND ("infant\*".mp OR "child\*".mp OR "daughter\*".mp OR "son".mp OR "sons".mp OR "fetus\*".mp OR "foetus\*".mp OR "adolescent\*".mp) AND (father\*.mp OR paternal\*.mp)) OR (("bonding".mp OR "bond".mp OR "bonds".mp OR "bonded".mp OR bond\*.mp) ADJ5 (father\*.mp OR paternal\*.mp))) NOT (conference review or conference abstract).pt

#### *IV. Web of Science*

(ts=("paternal bonding" OR "paternal bond" OR "paternal bonds" OR "paternal bond\*" OR "father bond\*" OR "father infant bond\*" OR "father daughter bond\*" OR "father son bond\*" OR "father to infant bond\*" OR "father to daughter bond\*" OR "father to son bond\*" OR "paternal infant bond\*" OR "paternal daughter bond\*" OR "paternal son bond\*" OR "paternal to infant bond\*" OR "paternal to daughter bond\*" OR "paternal to son bond\*" OR "paternal fetus bond\*" OR "father fetus bond\*" OR "paternal foetus bond\*" OR "father foetus bond\*" OR "paternal to fetus bond\*" OR "father to fetus bond\*" OR "paternal to foetus bond\*" OR "father to foetus bond\*" OR "paternal child bond\*" OR "father child bond\*" OR "paternal to child bond\*" OR "father to child bond\*" OR "paternal attach\*" OR "father attach\*" OR "father infant attach\*" OR "father daughter attach\*" OR "father son attach\*" OR "father to infant attach\*" OR "father to daughter attach\*" OR "father to son attach\*" OR "paternal infant attach\*" OR "paternal daughter attach\*" OR "paternal son attach\*" OR "paternal to infant attach\*" OR "paternal to daughter attach\*" OR "paternal to son attach\*" OR "paternal fetus attach\*" OR "father fetus attach\*" OR "paternal foetus attach\*" OR "father foetus attach\*")

OR "paternal to fetus attach\*" OR "father to fetus attach\*" OR "paternal to foetus attach\*" OR "father to foetus attach\*" OR "paternal child attach\*" OR "father child attach\*" OR "paternal to child attach\*" OR "father to child attach\*" OR "paternal adolescent bond\*" OR "father adolescent bond\*" OR "paternal to adolescent bond\*" OR "father to adolescent bond\*" OR "paternal adolescent attach\*" OR "father adolescent attach\*" OR "paternal to adolescent attach\*" OR "father to adolescent attach\*") OR (ti=("bonding" OR "bond" OR "bonds" OR "bonded" OR bond\*) AND ti=(father\* OR paternal\*)) OR (ti=("attachment" OR "attach\*") AND ti=(father\* OR paternal\*)) OR (ts=("bonding" OR "bond" OR "bonds" OR "bonded" OR bond\* OR attach\*) AND ts=("infant\*" OR "child\*" OR "daughter\*" OR "son" OR "sons" OR "fetus\*" OR "foetus\*" OR "adolescent\*")) AND ti=(father\* OR paternal\*)) OR (ti=("bonding" OR "bond" OR "bonds" OR "bonded" OR bond\* OR attach\*) AND ts=("infant\*" OR "child\*" OR "daughter\*" OR "son" OR "sons" OR "fetus\*" OR "foetus\*" OR "adolescent\*")) AND ts=(father\* OR paternal\*)) OR ts=(("bonding" OR "bond" OR "bonds" OR "bonded" OR bond\*) NEAR/2 (father\* OR paternal\*)) NOT dt=(conference abstract)

#### ✓ ***Cochrane***

((("paternal bonding" OR "paternal bond" OR "paternal bonds" OR "paternal bond\*" OR "father bond\*" OR "father infant bond\*" OR "father daughter bond\*" OR "father son bond\*" OR "father to infant bond\*" OR "father to daughter bond\*" OR "father to son bond\*" OR "paternal infant bond\*" OR "paternal daughter bond\*" OR "paternal son bond\*" OR "paternal to infant bond\*" OR "paternal to daughter bond\*" OR "paternal to son bond\*" OR "paternal fetus bond\*" OR "father fetus bond\*" OR "paternal foetus bond\*" OR "father foetus bond\*" OR "paternal to fetus bond\*" OR "father to fetus bond\*" OR "paternal to foetus bond\*" OR "father to foetus bond\*" OR "paternal child bond\*" OR "father child bond\*" OR "paternal to

child bond\*" OR "father to child bond\*" OR "paternal attach\*" OR "father attach\*" OR  
 "father infant attach\*" OR "father daughter attach\*" OR "father son attach\*" OR "father to  
 infant attach\*" OR "father to daughter attach\*" OR "father to son attach\*" OR "paternal infant  
 attach\*" OR "paternal daughter attach\*" OR "paternal son attach\*" OR "paternal to infant  
 attach\*" OR "paternal to daughter attach\*" OR "paternal to son attach\*" OR "paternal fetus  
 attach\*" OR "father fetus attach\*" OR "paternal foetus attach\*" OR "father foetus attach\*" OR  
 "paternal to fetus attach\*" OR "father to fetus attach\*" OR "paternal to foetus attach\*" OR  
 "father to foetus attach\*" OR "paternal child attach\*" OR "father child attach\*" OR  
 "paternal to child attach\*" OR "father to child attach\*" OR "paternal adolescent bond\*" OR  
 "father adolescent bond\*" OR "paternal to adolescent bond\*" OR "father to adolescent  
 bond\*" OR "paternal adolescent attach\*" OR "father adolescent attach\*" OR "paternal to  
 adolescent attach\*" OR "father to adolescent attach\*"):ti,ab,kw OR (("bonding" OR "bond"  
 OR "bonds" OR "bonded" OR bond\*) AND (father\* OR paternal\*)):ti OR (("attachment" OR  
 "attach\*") AND (father\* OR paternal\*)):ti OR (("bonding" OR "bond" OR "bonds" OR  
 "bonded" OR bond\* OR attach\*):ti,ab,kw AND ("infant\*" OR "child\*" OR "daughter\*" OR  
 "son" OR "sons" OR "fetus\*" OR "foetus\*" OR "adolescent\*"):ti,ab,kw AND (father\* OR  
 paternal\*):ti) OR (("bonding" OR "bond" OR "bonds" OR "bonded" OR bond\* OR attach\*):ti  
 AND ("infant\*" OR "child\*" OR "daughter\*" OR "son" OR "sons" OR "fetus\*" OR "foetus\*" OR  
 "adolescent\*"):ti,ab,kw AND (father\* OR paternal\*):ti,ab,kw) OR (("bonding" OR  
 "bond" OR "bonds" OR "bonded" OR bond\*) NEAR/2 (father\* OR paternal\*)):ti,ab,kw)  
 NOT (conference abstract):pt

✓/ *Emcare*

("paternal bonding".mp OR "paternal bond".mp OR "paternal bonds".mp OR "paternal  
 bond\*".mp OR "father bond\*".mp OR "father infant bond\*".mp OR "father daughter

bond\*".mp OR "father son bond\*".mp OR "father to infant bond\*".mp OR "father to daughter  
 bond\*".mp OR "father to son bond\*".mp OR "paternal infant bond\*".mp OR "paternal  
 daughter bond\*".mp OR "paternal son bond\*".mp OR "paternal to infant bond\*".mp OR  
 "paternal to daughter bond\*".mp OR "paternal to son bond\*".mp OR "paternal fetus  
 bond\*".mp OR "father fetus bond\*".mp OR "paternal foetus bond\*".mp OR "father foetus  
 bond\*".mp OR "paternal to fetus bond\*".mp OR "father to fetus bond\*".mp OR "paternal to  
 foetus bond\*".mp OR "father to foetus bond\*".mp OR "paternal child bond\*".mp OR "father  
 child bond\*".mp OR "paternal to child bond\*".mp OR "father to child bond\*".mp OR  
 "paternal attach\*".mp OR "father attach\*".mp OR "father infant attach\*".mp OR "father  
 daughter attach\*".mp OR "father son attach\*".mp OR "father to infant attach\*".mp OR  
 "father to daughter attach\*".mp OR "father to son attach\*".mp OR "paternal infant  
 attach\*".mp OR "paternal daughter attach\*".mp OR "paternal son attach\*".mp OR "paternal  
 to infant attach\*".mp OR "paternal to daughter attach\*".mp OR "paternal to son attach\*".mp  
 OR "paternal fetus attach\*".mp OR "father fetus attach\*".mp OR "paternal foetus attach\*".mp  
 OR "father foetus attach\*".mp OR "paternal to fetus attach\*".mp OR "father to fetus  
 attach\*".mp OR "paternal to foetus attach\*".mp OR "father to foetus attach\*".mp OR  
 "paternal child attach\*".mp OR "father child attach\*".mp OR "paternal to child attach\*".mp  
 OR "father to child attach\*".mp OR "paternal adolescent bond\*".mp OR "father adolescent  
 bond\*".mp OR "paternal to adolescent bond\*".mp OR "father to adolescent bond\*".mp OR  
 "paternal adolescent attach\*".mp OR "father adolescent attach\*".mp OR "paternal to  
 adolescent attach\*".mp OR "father to adolescent attach\*".mp OR ("father child relation"/  
 AND exp "Social Bonding"/) OR (("bonding".ti OR "bond".ti OR "bonds".ti OR "bonded".ti  
 OR bond\*.ti) AND (father\*.ti OR paternal\*.ti)) OR (("attachment".ti OR "attach\*".ti) AND  
 (father\*.ti OR paternal\*.ti)) OR (("bonding".mp OR "bond".mp OR "bonds".mp OR  
 "bonded".mp OR bond\*.mp OR attach\*.mp) AND ("infant\*".mp OR "child\*".mp OR



"daughter\*".mp OR "son".mp OR "sons".mp OR "fetus\*".mp OR "foetus\*".mp OR  
 "adolescent\*".mp) AND (father\*.ti OR paternal\*.ti)) OR (("bonding".ti OR "bond".ti OR  
 "bonds".ti OR "bonded".ti OR bond\*.ti OR attach\*.ti) AND ("infant\*".mp OR "child\*".mp  
 OR "daughter\*".mp OR "son".mp OR "sons".mp OR "fetus\*".mp OR "foetus\*".mp OR  
 "adolescent\*".mp) AND (father\*.mp OR paternal\*.mp)) OR (("bonding".mp OR "bond".mp  
 OR "bonds".mp OR "bonded".mp OR bond\*.mp) ADJ5 (father\*.mp OR paternal\*.mp)))

### *VII. PsycINFO*

(TX("paternal bonding" OR "paternal bond" OR "paternal bonds" OR "paternal bond\*" OR  
 "father bond\*" OR "father infant bond\*" OR "father daughter bond\*" OR "father son bond\*" OR  
 "father to infant bond\*" OR "father to daughter bond\*" OR "father to son bond\*" OR  
 "paternal infant bond\*" OR "paternal daughter bond\*" OR "paternal son bond\*" OR "paternal  
 to infant bond\*" OR "paternal to daughter bond\*" OR "paternal to son bond\*" OR "paternal  
 fetus bond\*" OR "father fetus bond\*" OR "paternal foetus bond\*" OR "father foetus bond\*" OR  
 "paternal to fetus bond\*" OR "father to fetus bond\*" OR "paternal to foetus bond\*" OR  
 "father to foetus bond\*" OR "paternal child bond\*" OR "father child bond\*" OR "paternal to  
 child bond\*" OR "father to child bond\*" OR "paternal attach\*" OR "father attach\*" OR  
 "father infant attach\*" OR "father daughter attach\*" OR "father son attach\*" OR "father to  
 infant attach\*" OR "father to daughter attach\*" OR "father to son attach\*" OR "paternal infant  
 attach\*" OR "paternal daughter attach\*" OR "paternal son attach\*" OR "paternal to infant  
 attach\*" OR "paternal to daughter attach\*" OR "paternal to son attach\*" OR "paternal fetus  
 attach\*" OR "father fetus attach\*" OR "paternal foetus attach\*" OR "father foetus attach\*" OR  
 "paternal to fetus attach\*" OR "father to fetus attach\*" OR "paternal to foetus attach\*" OR  
 "father to foetus attach\*" OR "paternal child attach\*" OR "father child attach\*" OR  
 "paternal to child attach\*" OR "father to child attach\*" OR "paternal adolescent bond\*" OR

"father adolescent bond\*" OR "paternal to adolescent bond\*" OR "father to adolescent bond\*" OR "paternal adolescent attach\*" OR "father adolescent attach\*" OR "paternal to adolescent attach\*" OR "father to adolescent attach\*") OR (TI("bonding" OR "bond" OR "bonds" OR "bonded" OR bond\*) AND TI(father\* OR paternal\*)) OR (TI("attachment" OR "attach\*") AND TI(father\* OR paternal\*)) OR (TX("bonding" OR "bond" OR "bonds" OR "bonded" OR bond\* OR attach\*) AND TX("infant\*" OR "child\*" OR "daughter\*" OR "son" OR "sons" OR "fetus\*" OR "foetus\*" OR "adolescent\*") AND TI(father\* OR paternal\*)) OR (TI("bonding" OR "bond" OR "bonds" OR "bonded" OR bond\* OR attach\*) AND TX("infant\*" OR "child\*" OR "daughter\*" OR "son" OR "sons" OR "fetus\*" OR "foetus\*" OR "adolescent\*") AND TX(father\* OR paternal\*)) OR TX(("bonding" OR "bond" OR "bonds" OR "bonded" OR bond\*) NEAR/2 (father\* OR paternal\*))
